# Supplementary material
Source: MDPI journal article supplement (https://www.mdpi.com/2076-3417/12/23/11961)
Supplement: s1 [file s1]

# Occurrence and Degradation of Free and Conjugated Estrogens in a River Receiving Feedlot Animal Discharge

Hao-Shen Hung, Kuei-Jyum C. Yeh, Chi-Ying Hsieh \* and Ting-Chien Chen \*

Department of Environmental Science and Engineering, National Pingtung University of Science and Technology, Pingtung 91201, Taiwan

\* Correspondence: chiying@mail.npust.edu.tw (C.-Y.H.);  
chen5637@mail.npust.edu.tw (T.-C.C.); Tel.: +886-8-774-0425 (T.-C.C.);  
Fax: +886-8-774-0122 (T.-C.C.)

Table S1. Physicochemical properties of steroid estrogens.

| Name         |                                                                                     | Estrogenic potency                             |                         |                   |          |       |
|--------------|-------------------------------------------------------------------------------------|------------------------------------------------|-------------------------|-------------------|----------|-------|
| Abbreviation | Molecular structure                                                                 | Molecular Formula                              | Water solubility (mg/L) | Log Kow           | E-Screen | YES   |
| E1           | 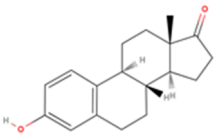 | C <sub>18</sub> H <sub>22</sub> O <sub>2</sub> | 30.0                    | 3.13              | 2.4      | 47    |
| E2           |  | C <sub>18</sub> H <sub>24</sub> O <sub>2</sub> | 3.9                     | 4.01              | 100      | 100   |
| E3           |  | C <sub>18</sub> H <sub>24</sub> O <sub>3</sub> | 558.0                   | 2.45              | 5.4      | 0.76  |
| EE2          |  | C <sub>20</sub> H <sub>24</sub> O <sub>2</sub> | 4.8 <sup>b</sup>        | 4.14 <sup>b</sup> | -        | -     |
| DES          |  | C <sub>18</sub> H <sub>20</sub> O <sub>2</sub> | PRACTICALLY INSOLUBLE   | -                 | -        | -     |
| E1-3G        |  | C <sub>24</sub> H <sub>30</sub> O <sub>8</sub> | 8471.7                  | 1.14              | 0.0029   | 0.053 |

|       |                                                                                   |                                                  |         |      |        |        |
|-------|-----------------------------------------------------------------------------------|--------------------------------------------------|---------|------|--------|--------|
| E2-3G | 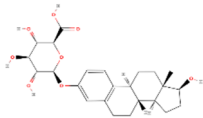 | C <sub>24</sub> H <sub>32</sub> O <sub>8</sub>   | 8829.8  | 1.67 | 0.13   | -      |
| E1-3S |  | C <sub>18</sub> H <sub>22</sub> O <sub>5</sub> S | 6328.6  | 2.81 | 0.0012 | 0.14   |
| E2-3S |  | C <sub>18</sub> H <sub>24</sub> O <sub>5</sub> S | 15893.0 | 3.33 | 0.26   | 0.0057 |

[4]; <sup>b</sup>[65]

Table S2. Quality assurance data for analyzing each target compound in DI water and river water.

|          | Recovery (%) |          | MDL  |
|----------|--------------|----------|------|
|          | River water  | DI water | ng/L |
| E1       | 79           | 93       | 0.3  |
| E1-d4    | 80           | 94       | 0.3  |
| E2       | 89           | 96       | 0.5  |
| E2-d5    | 87           | 96       | 0.5  |
| E3       | 91           | 99       | 0.4  |
| E1-3S    | 92           | 101      | 0.4  |
| E1-3S-d4 | 95           | 101      | 0.4  |
| E2-3S    | 97           | 100      | 0.3  |
| E1-3G    | 87           | 107      | 0.3  |
| E2-3G    | 85           | 102      | 0.5  |
| DES      | 66           | 75       | 0.6  |
| EE2      | 84           | 92       | 0.6  |
